# Supplementary material for: Epilepsieüberwachungsgeräte bei Kindern und Jugendlichen
Source: Springer Nature journal article supplement (doi:10.1007/s10309-023-00630-z), 2023-10-05
Supplement: MOESM1 [file 26130994]

S001

Liebe/r Teilnehmer/in!

Viele Eltern fürchten bei einem ersten Anfall um das Leben ihres Kindes. Auch wenn einzelne Anfälle typischerweise zunächst gerade im Kindesalter nicht lebensgefährlich sind, so gibt es doch ein erhöhtes Risiko für Menschen mit Epilepsie zu versterben. Viele Menschen mit Epilepsie versterben an den Grunderkrankungen oder beispielsweise an einer Lungenentzündung. Zusätzlich existiert das Phänomen des plötzlichen Todesfalls bei Epilepsien (SUDEP = sudden unexpected death in epileptic patients). Die Veröffentlichungen zum Thema SUDEP im Kindesalter haben in den letzten Jahren zugenommen. Viele Eltern wünschen daher eine Überwachungsmöglichkeit, insbesondere für nächtliche Anfälle. Bis vor einigen Jahren existierten nur wenige Überwachungsmöglichkeiten (Babyphone, EKG- und/oder Sättigungsmonitor, EpiCare®). In den letzten Jahren sind weitere Überwachungsgeräte für Epilepsien auf den Markt gekommen und es gibt auch mehrere wearables, die eine Überwachung ermöglichen.

Die Diskussion um die Überwachung beinhaltet eine Reihe von Spannungsfeldern. Dies betrifft u.a. auch den Konflikt zwischen Autonomiebedürfnis des Kindes bzw. Jugendlichen und dem elterlichen Wunsch nach Überwachung.

Die meisten Daten zu den Geräten stammen aus Epilepsiezentren. Angaben zu Fehlalarmen fehlen häufig und Daten zum Einsatz von Geräten zur Anfallsüberwachung aus dem Alltag fehlen fast komplett. Wir hatten selber einmal eine vergleichende Studie „keine Überwachung vs. Überwachung mittels Babyphone vs. Überwachung mittels EpiCare®“ durchgeführt. Angesichts der technischen Entwicklung wollen wir nun die aktuelle Umfrage zusammen mit dem e.b.e. durchführen, um daraus Empfehlungen für Eltern abzuleiten.

Teilen Sie uns auch gerne Ihre Erfahrungen mit, wenn Sie keine Geräte eingesetzt haben.

Es geht um Ihre ganz praktischen Erfahrungen im Alltag, die wir gerne an andere Eltern weitergeben wollen. Die Ergebnisse werden wir sowohl in einer Fachzeitschrift als auch in Kurzform im EpiKurier veröffentlichen.

Seite 02

Block1

BF01

Wir haben die Erfahrung gemacht, dass sich einige Geräte möglicherweise besser für kleinere, andere besser für größere Kinder eignen. Daher brauchen wir ein paar Basisangaben zu Ihrem Kind:

BF02 

Wie alt ist Ihr Kind?

Bitte geben Sie eine ganze Zahl an.

Jahre alt

**Wie viel wiegt Ihr Kind?**

**BF03** 

Bitte geben Sie eine ganze Zahl an.

 kg

**Welche Anfälle hat Ihr Kind?**

**BF04** 

Bitte Zutreffendes ankreuzen. Mehrere Angaben sind möglich.

- Große generalisierte Anfälle (Grand Mal)
- Andere Anfälle mit Zuckungen oder anderen Bewegungen
- Andere Anfälle ohne Zuckungen oder Bewegungen
- Weiß ich nicht

**Wie häufig treten nach Ihrer eigenen Einschätzung die epileptischen Anfälle bei Ihrem Kind auf?**

**BF05** 

Bitte geben Sie die ungefähre monatliche Anzahl der Fälle an. Verwenden Sie dabei bitte nur ganze Zahlen. Bei keinen Anfällen geben Sie bitte den Wert „0“ an.

- Ca.  große generalisierte Anfälle (Grand Mal) pro Monat
- Ca.  andere Anfälle mit Zuckungen oder anderen Bewegungen pro Monat
- Ca.  andere Anfälle ohne Zuckungen oder Bewegungen pro Monat

**Liegen bei Ihrem Kind eine Grunderkrankung oder Behinderung vor?**

**BF06** 

- nein
- ja, welche:

**Liegt bei Ihrem Kind eine Einschränkung der Mobilität vor?**

**BF07** 

- nein
- ja, welche

NG04

Wir sind an Informationen zu allen verschiedenen Überwachungsgeräten interessiert. Hierbei kann es sich um Babyphone, EKG-Monitore, spezielle Epilepsieüberwachungsgeräte etc. handeln.

NG02

Haben Sie schon mal ein Gerät zur Anfallsüberwachung bei Ihrem Kind benutzt?

ja

nein. Welche Gründe gab es für die „nicht Nutzung“?

### 2 aktive(r) Filter

#### Filter NG02/F1

Wenn eine der folgenden Antwortoption(en) ausgewählt wurde: 1  
Dann nach dem Klick auf "Weiter" direkt zur Seite **Block3** springen

#### Filter NG02/F2

Wenn eine der folgenden Antwortoption(en) ausgewählt wurde: 2  
Dann nach dem Klick auf "Weiter" den Text **NG05** anzeigen und das Interview beenden

G101

In diesem Fragebogenabschnitt werden Ihnen Fragen zu den Geräten, die Sie bei Ihrem Kind zum Anfallsüberwachung zu Hause benutzt haben, gestellt. Falls Sie bereits mehrere Geräte benutzt haben, tragen Sie bitte die Angaben zu jedem Gerät einzeln ein.

Lassen Sie uns gerne Ihre Erfahrungen mit den wichtigsten **drei Geräten** zukommen.

G102

## Gerät 1

Bitte geben Sie den Name des Geräts (z.B. Epi-Care 3000® oder NightWatch®) sowie des Herstellers (z.B. Epitech® oder LivAssured®) an:

Name des Geräts

Hersteller des Geräts

G105

**Wie haben Sie von diesem Gerät erfahren?**

Bitte Zutreffendes ankreuzen. Nur eine Angabe ist möglich:

Empfehlung (Arzt\*in)

Empfehlung (Bekannte/Freunde ect.)

Eigene Recherche im Internet und gute Bewertungen

Andere Quelle, und zwar

**G103**

**Wie alt war Ihr Kind als dieses Gerät bei ihm zum ersten Mal benutzt wurde?**

Bitte geben Sie eine ganze Zahl an.

Jahre alt

**G104**

**Wie schwer war Ihr Kind als dieses Gerät bei ihm eingesetzt wurde?**

Bitte geben Sie eine ganze Zahl an.

Ca.  kg

**G106**

**Wurden die Kosten für dieses Geräts durch die Krankenkasse übernommen?**

ja, komplett

ja, teilweise und zwar mit einem Anteil von ca.  %

nein

**G107**

**Zu welchen Zeiten wird/wurde das Gerät benutzt?**

Bitte Zutreffendes ankreuzen. Nur eine Angabe ist möglich:

tags

nachts

tags und nachts

**G111**

**Bitte beurteilen Sie dieses Gerät anhand der unterstehenden Kriterien:**

Bitte kreuzen Sie auf einer Schulnotenskala von 1 (sehr gut) bis 6 (sehr schlecht) den Wert an, der Ihre Meinung am ehesten wiedergibt.

|                                                    |          |               |
|----------------------------------------------------|----------|---------------|
| Benutzerfreundlichkeit                             | sehr gut | sehr schlecht |
| Zuverlässigkeit                                    | sehr gut | sehr schlecht |
| Eignung des Geräts für die Überwachung der Anfälle | sehr gut | sehr schlecht |

**G112** 

Mit dieser Frage möchten wir die Zuverlässigkeit dieses Geräts bei der Erkennung der Anfälle genauer beurteilen. Dafür fühlen Sie bitte die Lücken in den unterstehenden Sätzen mit Zahlen aus.

Verwenden Sie bitte nur ganze Zahlen. Bei keinen Anfällen geben Sie bitte den Wert „0“ an.

Es wurden ca.  große generalisierte Anfälle (Grand mal) und ca.  andere Anfälle mit Zuckungen oder heftigeren Bewegungen pro Monat **richtig erkannt**.

Es wurden ca.  große generalisierte Anfälle (Grand mal) und ca.  andere Anfälle mit Zuckungen oder heftigeren Bewegungen pro Monat **übersehen**.

Es gab ca.  **Fehlalarme** pro Monat, d.h. das Gerät hat alarmiert, ohne dass ein Anfall aufgetreten ist.

**G108** 

**Ist dieses Gerät aktuell in Nutzung?**

ja

nein. Warum wird dieses Gerät nicht mehr genutzt?

**G110** 

**Wie lange wurde das Gerät insgesamt genutzt?**

Bitte geben Sie die ungefähre Anzahl der Monate an. Verwenden Sie dabei bitte nur ganze Zahlen.

Monat(e)

**G113** 

**Weiter zum Ende der Umfrage**

**Weiter zum Gerät 2**

**1 aktive(r) Filter**

**Filter G113/F1**

Wenn eine der folgenden Antwortoption(en) ausgewählt wurde: **1**  
Dann nach dem Klick auf "Weiter" direkt zur Seite **WI** springen

**G201** 

## Gerät 2

Bitte geben Sie den Name des Geräts (z.B. Epi-Care 3000® oder NightWatch®) sowie des Herstellers (z.B. Epitech® oder LivAssured®) an:

Name des Geräts

Hersteller des Geräts

**G202** 

Wie haben Sie von diesem Gerät erfahren?

Bitte Zutreffendes ankreuzen. Nur eine Angabe ist möglich:

Empfehlung (Arzt\*in)

Empfehlung (Bekannte/Freunde ect.)

Eigene Recherche im Internet und gute Bewertungen

Andere Quelle, und zwar

**G203** 

Wie alt war Ihr Kind als dieses Gerät bei ihm zum ersten Mal benutzt wurde?

Bitte geben Sie eine ganze Zahl an.

Jahre alt

**G204** 

Wie schwer war Ihr Kind als dieses Gerät bei ihm eingesetzt wurde?

Bitte geben Sie eine ganze Zahl an.

Ca.  kg

**G205** 

Wurden die Kosten für dieses Geräts durch die Krankenkasse übernommen?

ja, komplett

ja, teilweise und zwar mit einem Anteil von ca.  %

nein

**Zu welchen Zeiten wird/wurde das Gerät benutzt?**

G206

Bitte Zutreffendes ankreuzen. Nur eine Angabe ist möglich:

tags

nachts

tags und nachts

**Bitte beurteilen Sie dieses Gerät anhand der unterstehenden Kriterien:**

G207

Bitte kreuzen Sie auf einer Schulnotenskala von 1 (sehr gut) bis 6 (sehr schlecht) den Wert an, der Ihre Meinung am ehesten wiedergibt.

|                                                    |          |               |
|----------------------------------------------------|----------|---------------|
| Benutzerfreundlichkeit                             | sehr gut | sehr schlecht |
| Zuverlässigkeit                                    | sehr gut | sehr schlecht |
| Eignung des Geräts für die Überwachung der Anfälle | sehr gut | sehr schlecht |

**Mit dieser Frage möchten wir die Zuverlässigkeit dieses Geräts bei der Erkennung der Anfälle genauer beurteilen. Dafür fühlen Sie bitte die Lücken in den unterstehenden Sätzen mit Zahlen aus.**

G208

Verwenden Sie bitte nur ganze Zahlen. Bei keinen Anfällen geben Sie bitte den Wert „0“ an.

Es wurden ca.  große generalisierte Anfälle (Grand mal) und ca.  andere Anfälle mit Zuckungen oder heftigeren Bewegungen pro Monat **richtig erkannt**.

Es wurden ca.  große generalisierte Anfälle (Grand mal) und ca.  andere Anfälle mit Zuckungen oder heftigeren Bewegungen pro Monat **übersehen**.

Es gab ca.  **Fehlalarme** pro Monat, d.h. das Gerät hat alarmiert, ohne dass ein Anfall aufgetreten ist.

**Ist dieses Gerät aktuell in Nutzung?**

G209

ja

nein. Warum wird dieses Gerät nicht mehr genutzt?

**Wie lange wurde das Gerät insgesamt genutzt?**

G211

Bitte geben Sie die ungefähre Anzahl der Monate an. Verwenden Sie dabei bitte nur ganze Zahlen.

Monat(e)

G212

**Weiter zum Ende der Umfrage**

**Weiter zum Gerät 3**

**1 aktive(r) Filter**

**Filter G212/F1**

Wenn eine der folgenden Antwortoption(en) ausgewählt wurde: **1**  
Dann nach dem Klick auf "Weiter" direkt zur Seite **WI** springen

**Seite 06**

Block5

**G301** 

## Gerät 3

Bitte geben Sie den Name des Geräts (z.B. Epi-Care 3000® oder NightWatch®) sowie des Herstellers (z.B. Epitech® oder LivAssured®) an:

Name des Geräts

Hersteller des Geräts

**G302** 

**Wie haben Sie von diesem Gerät erfahren?**

Bitte Zutreffendes ankreuzen. Nur eine Angabe ist möglich:

Empfehlung (Arzt\*in)

Empfehlung (Bekannte/Freunde ect.)

Eigene Recherche im Internet und gute Bewertungen

Andere Quelle, und zwar

**G303** 

**Wie alt war Ihr Kind als dieses Gerät bei ihm zum ersten Mal benutzt wurde?**

Bitte geben Sie eine ganze Zahl an.

Jahre alt

**G304** 



**Wie schwer war Ihr Kind als dieses Gerät bei ihm eingesetzt wurde?**

Bitte geben Sie eine ganze Zahl an.

Ca.  kg

**Wurden die Kosten für dieses Geräts durch die Krankenkasse übernommen?**

G305

ja, komplett

ja, teilweise und zwar mit einem Anteil von ca.  %

nein

**Zu welchen Zeiten wird/wurde das Gerät benutzt?**

G306

Bitte Zutreffendes ankreuzen. Nur eine Angabe ist möglich:

tags

nachts

tags und nachts

**Bitte beurteilen Sie dieses Gerät anhand der unterstehenden Kriterien:**

G307

Bitte kreuzen Sie auf einer Schulnotenskala von 1 (sehr gut) bis 6 (sehr schlecht) den Wert an, der Ihre Meinung am ehesten wiedergibt.

Benutzerfreundlichkeit

sehr gut

sehr schlecht

Zuverlässigkeit

sehr gut

sehr schlecht

Eignung des Geräts für die Überwachung der Anfälle

sehr gut

sehr schlecht

**Mit dieser Frage möchten wir die Zuverlässigkeit dieses Geräts bei der Erkennung der Anfälle genauer beurteilen. Dafür fühlen Sie bitte die Lücken in den unterstehenden Sätzen mit Zahlen aus.**

G308

Verwenden Sie bitte nur ganze Zahlen. Bei keinen Anfällen geben Sie bitte den Wert „0“ an.

Es wurden ca.  große generalisierte Anfälle (Grand mal) und ca.  andere Anfälle mit Zuckungen oder heftigeren Bewegungen pro Monat **richtig erkannt**.

Es wurden ca.  große generalisierte Anfälle (Grand mal) und ca.  andere Anfälle mit Zuckungen oder heftigeren Bewegungen pro Monat **übersehen**.

Es gab ca.  **Fehlalarme** pro Monat, d.h. das Gerät hat alarmiert, ohne dass ein Anfall aufgetreten ist.

G309

Ist dieses Gerät aktuell in Nutzung?

ja

nein. Warum wird dieses Gerät nicht mehr genutzt?

Wie lange wurde das Gerät insgesamt genutzt?

G310

Bitte geben Sie die ungefähre Anzahl der Monate an. Verwenden Sie dabei bitte nur ganze Zahlen.

Monat(e)

---

Seite 07  
WI

Haben Sie uns noch etwas zum Thema „Epilepsie-Überwachungsgeräte“ zu berichten?

WI02

ja, und zwar

Ich habe nichts weiter zu diesem Thema zu berichten

---

Seite 08  
KD

**Folgende Angabe ist absolut freiwillig!**

KD01

Es kann sein, dass nach Auswertung der Antworten noch Fragen offen sind, die uns möglicherweise weiterhelfen. Wenn wir Sie dazu entweder per E-Mail oder telefonisch kontaktieren dürfen, so wären wir für die Kontaktdaten dankbar. Wir versichern, dass wir die Daten nicht zu Werbezwecken o.ä. verwenden und auch nicht weiterleiten werden. Wenn Sie im Bedarfsfall für eine kurze Rückfrage zur Verfügung stehen, so tragen Sie doch bitte ein, wie wir Sie am liebsten kontaktieren sollen:

E-Mail

Telefon

KD02

Ich möchte keine Angaben machen

## Vielen Dank für Ihre Teilnahme!

Wir möchten uns ganz herzlich für Ihre Mithilfe bedanken.

Ihre Antworten wurden gespeichert, Sie können das Browser-Fenster nun schließen.

---

### Möchten Sie in Zukunft an interessanten und spannenden Online-Befragungen teilnehmen?

Wir würden uns sehr freuen, wenn Sie Ihre E-Mail-Adresse für das SoSci Panel anmelden und damit wissenschaftliche Forschungsprojekte unterstützen.

E-Mail:

[Am Panel teilnehmen](#)

Die Teilnahme am SoSci Panel ist freiwillig, unverbindlich und kann jederzeit widerrufen werden.

Das SoSci Panel speichert Ihre E-Mail-Adresse nicht ohne Ihr Einverständnis, sendet Ihnen keine Werbung und gibt Ihre E-Mail-Adresse nicht an Dritte weiter.

Sie können das Browserfenster selbstverständlich auch schließen, ohne am SoSci Panel teilzunehmen.
